# Supplementary material
Source: PubMed Central journal article supplement (PMC3426865)
Supplement: NIHMS393714-supplement-3_si_003.pdf [file NIHMS393714-supplement-3_si_003.pdf]

# Supporting Information

## A General One-pot, Two-step Protocol Accessing a Range of Polycyclic Heterocycles with High Skeletal Diversity

*Zhigang Xu a, Muhammad Ayaz a, Alexandra A. Cappelli a and Christopher Hulme\*<sup>a</sup>*

<sup>a</sup> College of Pharmacy, BIO5 Oro Valley, The University of Arizona, 1580 E. Hanley Blvd., Oro Valley, AZ 85737 USA. \*Corresponding author. E-mail address: [hulme@pharmacy.arizona.edu](mailto:hulme@pharmacy.arizona.edu).

### Table of Contents

|                                                     |    |
|-----------------------------------------------------|----|
| General Experimental Methods.....                   | S2 |
| Characterization Data for compounds <b>6</b> .....  | S2 |
| Characterization Data for compounds <b>9</b> .....  | S4 |
| Characterization Data for compounds <b>12</b> ..... | S8 |

## General Experimental Methods

Solvents were purchased from commercial providers and used without further purification. Other reagents were used as obtained from commercial providers except when otherwise noted. Analytical thin layer chromatography (TLC) was performed on pre-coated silica gel plates. Visualization was accomplished with UV light or by staining with basic KMnO<sub>4</sub> solution. Column chromatography was performed using automated chromatographic systems. Melting points were determined in an open glass capillary and are uncorrected. NMR spectra were recorded in CDCl<sub>3</sub> at 400 MHz (<sup>1</sup>H NMR) and 100 MHz (<sup>13</sup>C NMR). Low and high resolution mass spectra were obtained using ESI methods.

### Characterization Data for compounds 6

**1,6,7-trimethyl-*N*-pentyl-2,3-dihydro-1*H*-benzo[*d*]pyrrolo[1,2-*α*]imidazole-1-carboxamide, 6{1,1,1}**. White solid, (35.6 mg, 0.125 mmol, 50%) m.p. 128–130°C. <sup>1</sup>H NMR (400 MHz, CDCl<sub>3</sub>) δ 7.73 (d, *J* = 7.8 Hz, 1H), 7.36 – 7.25 (d, *J* = 7.8 Hz, 1H), 7.31 – 7.23 (m, 2H), 5.79 (bs, 1H), 3.29 (dt, *J* = 13.5, 6.7 Hz, 1H), 3.13 (dt, *J* = 12.6, 6.3 Hz, 1H), 3.03-2.91 (m, 3H), 2.65 (dd, *J* = 17.5, 9.0 Hz, 1H), 1.84 (s, 3H), 1.38 (dt, *J* = 14.6, 7.2 Hz, 2H), 1.24 (dd, *J* = 13.7, 6.5 Hz, 2H), 1.14 (dd, *J* = 15.0, 8.3 Hz, 2H), 0.83 (t, *J* = 7.2 Hz, 3H). <sup>13</sup>C NMR (100 MHz, CDCl<sub>3</sub>) δ 172.0, 161.0, 149.3, 130.5, 122.9, 122.5, 120.2, 110.0, 66.4, 40.7, 39.8, 29.0, 28.8, 23.0, 23.7, 22.2, 13.9. HRMS calculated for C<sub>17</sub>H<sub>24</sub>N<sub>3</sub>O [M+H]<sup>+</sup>, 286.19139; found 286.13125.

**1-methyl-*N*-pentyl-2, 3-dihydro-1*H*-benzo[*d*]pyrrolo[1,2-*α*]imidazole-1-carboxamide, 6{1,2,1}**.

Colorless oil, (43 mg, 0.137 mmol, 55%). <sup>1</sup>H NMR (400 MHz, CDCl<sub>3</sub>) δ 7.41 (s, 1H), 7.08 (s, 1H), 6.18 (bs, 1H), 3.35 (dt, *J* = 13.4, 6.7 Hz, 1H), 3.14 (dt, *J* = 13.0, 7.0 Hz, 1H), 2.99 – 2.85

(m, 2H), 2.80 – 2.68 (m, 1H), 2.60 (dd,  $J = 11.3, 4.1$  Hz, 1H), 2.35 (s, 6H), 1.78 (s, 3H), 1.44 – 1.40 (m, 2H), 1.28 – 1.21 (m, 2H), 1.19 – 1.10 (m, 2 H), 0.83 (t,  $J = 7.2$  Hz, 3H).  $^{13}\text{C}$  NMR (100 MHz,  $\text{CDCl}_3$ )  $\delta$  172.1, 160.0, 147.6, 131.4, 131.2, 129.0, 120.0, 110.2, 65.8, 40.7, 39.7, 29.1, 28.9, 22.8, 22.6, 22.2, 20.4, 13.9. HRMS calculated for  $\text{C}_{19}\text{H}_{28}\text{N}_3\text{O}$   $[\text{M}+\text{H}]^+$ , 314.22269; found 314.22293.

**10,11-dimethyl-*N*-pentyl-7*H*-benzo[*de*]benzo[4,5]imidazo[2,1-*a*]isoquinoline-7-**

**carboxamide, 6{3,2,1}**. Amorphous solid, (57.6 mg, 0.145 mmol, 58%).  $^1\text{H}$  NMR (400 MHz,  $\text{CDCl}_3$ )  $\delta$  8.08 (t,  $J = 8.4$  Hz, 2H), 7.87 (t,  $J = 8.8$  Hz, 2H), 7.62 (t,  $J = 7.3$  Hz, 1H), 7.40 (t,  $J = 7.6$  Hz, 1H), 7.22 (s, 1H), 7.14 (s, 1H), 6.65 (bs, 1H), 6.34 (s, 1H), 3.31 – 3.19 (m, 1H), 3.11 (dd,  $J = 19.7, 13.1$  Hz, 1H), 2.38 (s, 3H), 2.21 (s, 3H), 1.11 – 1.06 (m, 3H), 0.94 – 0.88 (m, 3H), 0.69 (t,  $J = 7.3$  Hz, 3H).  $^{13}\text{C}$  NMR (100 MHz,  $\text{CDCl}_3$ )  $\delta$  169.4, 146.0, 142.3, 132.9, 132.7, 132.3, 129.6, 128.1, 126.5, 126.1, 125.1, 122.3, 121.2, 119.2, 109.8, 61.7, 39.7, 28.9, 28.7, 22.2, 20.5, 20.1, 13.8. HRMS calculated for  $\text{C}_{26}\text{H}_{28}\text{N}_3\text{O}$   $[\text{M}+\text{H}]^+$ , 398.22269; found 398.22299.

**1-methyl-*N*-(naphthalen-2-yl)-2,3-dihydro-1*H*-benzo[*d*]pyrrolo[1,2-*a*]imidazole-1-**

**carboxamide, 6{1,1,2}**. Light yellow oil, (41.8 mg, 0.122 mmol, 49%).  $^1\text{H}$  NMR (400 MHz,  $\text{CDCl}_3$ )  $\delta$  9.20 (s, 1H), 8.23 (t,  $J = 2.2$  Hz, 1H), 7.75 – 7.64 (m, 4H), 7.48 – 7.29 (m, 6H), 3.27 (dt,  $J = 13.0, 7.6$  Hz, 1H), 3.16 (t,  $J = 7.4$  Hz, 2H), 2.76 (dt,  $J = 13.3, 7.6$  Hz, 1H), 1.91 (s, 3H).  $^{13}\text{C}$  NMR (100 MHz,  $\text{CDCl}_3$ )  $\delta$  169.2, 159.5, 135.0, 133.6, 130.9, 129.2, 128.6, 127.7, 127.5, 126.5, 125.3, 124.5, 120.3, 117.9, 117.7, 111.1, 68.2, 39.9, 23.0, 22.7. HRMS calculated for  $\text{C}_{22}\text{H}_{20}\text{N}_3\text{O}$   $[\text{M}+\text{H}]^+$ , 342.16009; found 342.15997.

**1,6,7-trimethyl-*N*-(naphthalen-2-yl)-2,3-dihydro-1*H*-benzo[*d*]pyrrolo[1,2-*a*] imidazole-1-**

**carboxamide, 6{1,2,3}**. Dark brown oil, (43.4 mg, 0.117 mmol, 47%).  $^1\text{H}$  NMR (400 MHz,

CDCl<sub>3</sub>) δ 8.67 (s, 1H), 8.22 (d, *J* = 2.1 Hz, 1H), 7.77 – 7.68 (m, 2H), 7.50 (s, 1H), 7.40 – 7.34 (m, 1H), 7.30 (s, 3H), 7.23 (s, 1H), 3.14 (t, *J* = 6.7 Hz, 2H), 2.99 (t, *J* = 6.6 Hz, 2H), 2.32 (s, 6H), 2.08 (s, 3H). <sup>13</sup>C NMR (100 MHz, CDCl<sub>3</sub>) δ 174.0, 153.3, 140.3, 137.9, 135.9, 134.7, 133.5, 132.0, 130.8, 129.9, 128.6, 127.6, 127.4, 126.5, 125.2, 120.2, 114.7, 63.6, 38.3, 22.8, 19.4, 19.1. HRMS calculated for C<sub>24</sub>H<sub>24</sub>N<sub>3</sub>O [M+H]<sup>+</sup>, 370.19139; found 370.19125.

**1,7,8-trimethyl-*N*-(naphthalen-2-yl)-1,2,3,4-tetrahydrobenzo[4,5]imidazo[1,2-*a*]pyridine-1-carboxamide, 6{2,2,2}**. Dark brown solid, (53.7 mg, 0.140 mmol, 56%) m.p. 115–117°C. <sup>1</sup>H NMR (400 MHz, CDCl<sub>3</sub>) δ 10.22 (s, 1H), 8.33 (s, 1H), 7.74 – 7.58 (m, 4H), 7.40 – 7.29 (m, 2H), 7.17 (s, 1H), 6.91 (s, 1H), 3.33 (m, 2H), 2.77 (t, *J* = 12.2 Hz, 1H), 2.31 – 2.14 (m, 2H), 2.13 (s, 3H), 2.02 – 1.92 (m, 1H), 1.83 (s, 3H), 1.70 (s, 3H). <sup>13</sup>C NMR (100 MHz, CDCl<sub>3</sub>) δ 169.7, 162.3, 162.0, 150.7, 135.6, 135.1, 134.6, 133.6, 130.6, 128.5, 127.7, 127.5, 126.3, 125.0, 120.4, 117.6, 115.0, 112.3, 64.5, 33.4, 22.6, 22.3, 20.5, 19.4, 15.9. HRMS calculated for C<sub>25</sub>H<sub>26</sub>N<sub>3</sub>O [M+H]<sup>+</sup>, 384.20704; found 384.20688.

### Characterization Data for compounds 9

**5-(1*H*-benzo[*d*]imidazol-2-yl)-1-cyclopropyl-5-methylpyrrolidin-2-one, 9{1,1}**. Colorless oil, (72.7 mg, 0.285 mmol, 57%). <sup>1</sup>H NMR (400 MHz, CDCl<sub>3</sub>) δ 11.92 (s, 1H), 7.78 (s, 1H), 7.52 (dd, *J* = 5.6, 3.3 Hz, 1H), 7.29 – 7.20 (m, 2H), 2.81 – 2.74 (m, 1H), 2.59 – 2.40 (m, 2H), 2.37 – 2.18 (m, 2H), 2.07 (s, 3H), 0.92 – 0.87 (m, 1H), 0.78 – 0.61 (m, 2H), 0.65 – 0.53 (m, 1H). <sup>13</sup>C NMR (100 MHz, CDCl<sub>3</sub>) δ 177.3, 157.1, 143.0, 134.8, 123.0, 121.9, 119.4, 111.3, 64.9, 34.56, 30.2, 24.7, 23.8, 6.5, 3.6. HRMS calculated for C<sub>15</sub>H<sub>18</sub>N<sub>3</sub>O [M+H]<sup>+</sup>, 256.1444; found 256.1441.

**5-(1*H*-benzo[*d*]imidazol-2-yl)-5-methyl-1-(pyridin-2-ylmethyl)pyrrolidin-2-one, 9{1,2}**. Yellow oil, (81.1 mg, 0.265 mmol, 53%). <sup>1</sup>H NMR (400 MHz, CDCl<sub>3</sub>) δ 8.67 (d *J* = 1.7 Hz, 1H),

7.72 (td,  $J = 7.7, 1.8$  Hz, 1H), 7.69 – 7.44 (m, 2H), 7.41 (d,  $J = 7.8$  Hz, 1H), 7.29 (dd,  $J = 7.5, 5.0$  Hz, 1H), 7.25 – 7.20 (m, 2H), 4.59 (d,  $J = 15.2$  Hz, 1H), 4.26 (d,  $J = 15.2$  Hz, 1H), 2.57 – 2.43 (m, 3H), 2.42 – 2.35 (m, 1H), 1.91 (s, 3H).  $^{13}\text{C}$  NMR (100 MHz,  $\text{CDCl}_3$ )  $\delta$  176.0, 158.2, 156.5, 147.7, 137.7, 124.0, 122.8, 122.2, 64.5, 46.4, 35.6, 29.1, 24.4. HRMS calculated for  $\text{C}_{18}\text{H}_{19}\text{N}_4\text{O}$   $[\text{M}+\text{H}]^+$ , 307.1553; found 307.1555.

**6-(1H-benzo[d]imidazol-2-yl)-1-benzyl-6-methylpiperidin-2-one, 9{2,3}**. Light yellow oil, (75.0 mg, 0.235 mmol, 47%).  $^1\text{H}$  NMR (400 MHz,  $\text{CDCl}_3$ )  $\delta$  12.18 (s, 1H), 7.72 (d,  $J = 8.0$  Hz, 1H), 7.35 – 7.06 (m, 6H), 7.05 – 6.67 (m, 2H), 5.38 (d,  $J = 15.8$  Hz, 1H), 3.80 (d,  $J = 16.0$  Hz, 1H), 2.79 – 2.59 (m, 2H), 2.37 (s, 1H), 2.16 (d,  $J = 7.5$  Hz, 1H), 1.99 – 1.73 (m, 4H), 1.51 – 1.47 (m, 1H).  $^{13}\text{C}$  NMR (100 MHz,  $\text{CDCl}_3$ )  $\delta$  172.5, 172.1, 157.1, 138.0, 128.6, 128.5, 126.9, 126.4, 122.7, 121.9, 119.1, 111.5, 63.0, 48.4, 38.7, 33.0, 27.0, 17.4. HRMS calculated for  $\text{C}_{20}\text{H}_{22}\text{N}_3\text{O}$   $[\text{M}+\text{H}]^+$ , 320.1757; found 320.1760.

**6-(1H-benzo[d]imidazol-2-yl)-1-(4-methoxybenzyl)-6-methylpiperidin-2-one, 9{2,4}**. Light yellow oil, (87.3 mg, 0.250 mmol, 50%).  $^1\text{H}$  NMR (400 MHz,  $\text{CDCl}_3$ )  $\delta$  12.05 (s, 1H), 7.72 (d,  $J = 7.6$  Hz, 1H), 7.23 – 6.97 (m, 5H), 6.86 – 6.67 (m, 2H), 5.28 (d,  $J = 15.7$  Hz, 1H), 3.82 – 3.68 (m, 4H), 2.73 – 2.58 (m, 2H), 2.43 – 2.30 (m, 1H), 2.18 – 2.05 (m, 1H), 1.89 – 1.72 (m, 4H), 1.58 – 1.43 (m, 1H).  $^{13}\text{C}$  NMR (100 MHz,  $\text{CDCl}_3$ )  $\delta$  172.5, 158.6, 157.2, 130.2, 128.4, 127.9, 122.7, 121.9, 119.1, 114.1, 113.9, 111.5, 63.0, 55.3, 47.9, 38.8, 33.1, 27.1, 17.4. HRMS calculated for  $\text{C}_{21}\text{H}_{24}\text{N}_3\text{O}_2$   $[\text{M}+\text{H}]^+$ , 350.1863; found 350.1867.

**3-(1H-benzo[d]imidazol-2-yl)-2-phenylisoindolin-1-one, 9{4,5}**. Light yellow oil, (91.0 mg, 0.280 mmol, 56%).  $^1\text{H}$  NMR (400 MHz,  $\text{CDCl}_3$ )  $\delta$  12.05 (s, 1H), 7.77 (dd,  $J = 16.9, 7.8$  Hz, 3H), 7.64 – 7.33 (m, 3H), 7.32 – 7.15 (m, 4H), 7.09 (dd,  $J = 15.5, 8.8$  Hz, 3H), 6.56 (s, 1H).  $^{13}\text{C}$  NMR

(100 MHz, CDCl<sub>3</sub>)  $\delta$  169.0, 150.3, 143.3, 142.1, 137.4, 134.7, 133.0, 130.4, 129.4, 129.2, 125.7, 123.6, 123.3, 122.2, 121.3, 119.5, 111.7, 61.7. HRMS calculated for C<sub>21</sub>H<sub>16</sub>N<sub>3</sub>O [M+H]<sup>+</sup>, 326.1288; found 326.1290.

**3-(1*H*-benzo[*d*]imidazol-2-yl)-2-(4-methoxyphenyl)isoindolin-1-one, 9{4,4}**. Light yellow solid, (104.7 mg, 0.295 mmol, 59%) m.p. 196-198 °C. <sup>1</sup>H NMR (400 MHz, CDCl<sub>3</sub>)  $\delta$  13.24 (s, 1H), 7.82 – 7.40 (m, 6H), 7.37 – 7.17 (m, 2H), 7.07 (t, *J* = 6.0 Hz, 2H), 6.71 (dd, *J* = 23.0, 14.0 Hz, 3H), 3.69 (d, *J* = 8.4 Hz, 3H). <sup>13</sup>C NMR (100 MHz, CDCl<sub>3</sub>)  $\delta$  168.7, 157.6, 150.1, 141.6, 132.7, 130.3, 129.6, 129.4, 124.0, 123.2, 114.3, 61.4, 55.1. HRMS calculated for C<sub>22</sub>H<sub>18</sub>N<sub>3</sub>O<sub>2</sub> [M+H]<sup>+</sup>, 356.1394; found 356.1395.

**3-(1*H*-benzo[*d*]imidazol-2-yl)-2-benzyl-3-methylisoindolin-1-one, 9{5,3}**. Light yellow oil, (109.4 mg, 0.310 mmol, 62%). <sup>1</sup>H NMR (400 MHz, cdcl<sub>3</sub>)  $\delta$  12.05 (s, 1H), 7.87 (d, *J* = 7.5 Hz, 1H), 7.46 – 7.37 (m, 3H), 7.31 – 7.13 (m, 8H), 7.08 (ddd, *J* = 7.8, 4.7, 3.4 Hz, 1H), 5.28 (d, *J* = 15.7 Hz, 1H), 4.20 (d, *J* = 15.7 Hz, 1H), 1.96 (s, 3H). <sup>13</sup>C NMR (100 MHz, CDCl<sub>3</sub>)  $\delta$  169.6, 152.8, 149.0, 143.4, 137.3, 135.1, 132.6, 129.3, 128.9, 128.5, 127.9, 127.4, 123.3, 122.2, 122.0, 119.6, 111.6, 66.8, 44.8, 23.5. HRMS calculated for C<sub>23</sub>H<sub>20</sub>N<sub>3</sub>O [M+H]<sup>+</sup>, 354.1601; found 354.1595.

**3-(1*H*-benzo[*d*]imidazol-2-yl)-3-methyl-2-(pyridin-2-ylmethyl)isoindolin-1-one, 9{5,2}**. Yellow oil, (97.4 mg, 0.275 mmol, 55%). <sup>1</sup>H NMR (400 MHz, CDCl<sub>3</sub>)  $\delta$  13.94 (s, 1H), 8.64 – 8.57 (m, 1H), 7.81 (d, *J* = 6.6 Hz, 1H), 7.73 (ddd, *J* = 9.5, 5.6, 1.7 Hz, 2H), 7.64 (d, *J* = 7.5 Hz, 1H), 7.48 (ddd, *J* = 7.9, 5.5, 1.6 Hz, 2H), 7.34 (tt, *J* = 7.5, 3.8 Hz, 2H), 7.26 – 7.24 (m, 3H), 4.80 (d, *J* = 15.6 Hz, 1H), 4.67 (d, *J* = 15.6 Hz, 1H), 2.15 (s, 3H). <sup>13</sup>C NMR (100 MHz, CDCl<sub>3</sub>)  $\delta$

169.0, 156.5, 154.2, 149.2, 147.9, 137.5, 132.5, 129.1, 128.6, 123.4, 122.8, 66.2, 46.2, 24.6.

HRMS calculated for C<sub>22</sub>H<sub>19</sub>N<sub>4</sub>O [M+H]<sup>+</sup>, 355.1553; found 355.1554.

**5-(1*H*-benzo[*d*]imidazol-2-yl)-4-benzyl-4,5-dihydrobenzo[*f*][1,4]oxazepin-3(2*H*)-one, 9{6,2}.**

Light yellow oil. (118.1 mg, 0.320 mmol, 64%) <sup>1</sup>H NMR (400 MHz, CDCl<sub>3</sub>) δ 10.35 (s, 1H), 7.72 (s, 1H), 7.47 – 7.25 (m, 7H), 7.24 – 7.18 (m, 2H), 7.15 (d, *J* = 8.0 Hz, 1H), 7.06 (d, *J* = 4.7 Hz, 2H), 5.70 – 5.60 (m, 2H), 5.10 (d, *J* = 16.8 Hz, 1H), 4.59 (d, *J* = 16.8 Hz, 1H), 4.22 (d, *J* = 14.9 Hz, 1H). <sup>13</sup>C NMR (100 MHz, CDCl<sub>3</sub>) δ 169.3, 156.8, 151.9, 135.9, 131.5, 130.4, 130.2, 128.8, 128.3, 127.9, 125.9, 121.2, 73.7, 60.0, 51.0. HRMS calculated for C<sub>23</sub>H<sub>20</sub>N<sub>3</sub>O<sub>2</sub> [M+H]<sup>+</sup>, 370.1550; found 370.1552.

**5-(1*H*-benzo[*d*]imidazol-2-yl)-4-(4-methoxybenzyl)-4,5-dihydrobenzo[*f*][1,4]oxazepin-**

**3(2*H*)- one, 9{6,4}.** Light yellow oil, (124.7 mg, 0.310 mmol, 62%). <sup>1</sup>H NMR (400 MHz, CDCl<sub>3</sub>) δ 10.26 (s, 1H), 7.72 (s, 1H), 7.46 – 7.31 (m, 2H), 7.31 – 7.19 (m, 4H), 7.16 (d, *J* = 7.9 Hz, 1H), 7.11 – 7.04 (m, 2H), 6.89 – 6.83 (m, 2H), 5.69 (s, 1H), 5.56 (d, *J* = 14.7 Hz, 1H), 5.10 (d, *J* = 16.8 Hz, 1H), 4.57 (d, *J* = 16.8 Hz, 1H), 4.13 (d, *J* = 14.6 Hz, 1H), 3.80 (s, 3H). <sup>13</sup>C NMR (100 MHz, CDCl<sub>3</sub>) δ 169.2, 159.3, 156.8, 151.9, 131.4, 130.4, 130.2, 129.9, 127.9, 125.9, 123.5, 122.4, 121.2, 119.8, 114.2, 111.1, 73.7, 59.7, 55.3, 50.3. HRMS calculated for C<sub>24</sub>H<sub>22</sub>N<sub>3</sub>O<sub>3</sub> [M+H]<sup>+</sup>, 400.1656; found 400.1656.

**3-(1*H*-benzo[*d*]imidazol-2-yl)-2-cyclopropyl-2,3-dihydro-1*H*-benzo[*de*]isoquinolin-1-one, 9{3,1}.**

Light yellow oil, (86.4 mg, 0.255 mmol, 51%). <sup>1</sup>H NMR (400 MHz, CDCl<sub>3</sub>) δ 12.32 (s, 1H), 7.89 (dd, *J* = 16.7, 7.8 Hz, 2H), 7.80 (d, *J* = 8.1 Hz, 2H), 7.60 (d, *J* = 7.2 Hz, 1H), 7.49 (dd, *J* = 16.0, 7.8 Hz, 2H), 7.23 – 7.11 (m, 3H), 6.59 (s, 1H), 2.83 – 2.73 (m, 1H), 1.08 – 0.96 (m, 2H),

0.96 – 0.85 (m, 1H), 0.76 – 0.65 (m, 1H). <sup>13</sup>C NMR (100 MHz, CDCl<sub>3</sub>) δ 165.0, 154.1, 132.2, 132.0, 128.5, 127.2, 127.1, 126.7, 126.6, 126.0, 125.7, 123.5, 123.0, 122.0, 119.5, 111.8, 61.4, 29.6, 9.9, 6.4. HRMS calculated for C<sub>22</sub>H<sub>18</sub>N<sub>3</sub>O [M+H]<sup>+</sup>, 340.1444; found 340.1447.

### Characterization Data for compounds 12

#### **1-(1*H*-benzo[*d*]imidazol-2-yl)-1-methyl-1,2,3,9-tetrahydropyrrolo[2,1-*b*]quinazoline,**

**12**{1,2}. Light yellow solid, (93.6 mg, 0.310 mmol, 53%) m.p. 213-215 °C. <sup>1</sup>H NMR (400 MHz, *d*-DMSO) δ 12.93 (s, 1H), 7.60 – 7.52 (m, 2H), 7.32 (td, *J* = 7.9, 1.7 Hz, 1H), 7.23 – 7.09 (m, 5H), 4.83 (d, *J* = 15.5 Hz, 1H), 4.48 (d, *J* = 15.4 Hz, 1H), 3.29 – 3.08 (m, 2H), 2.58 – 2.56 (m, 1H), 2.46 – 2.43 (m, 1H), 1.94 (s, 3H). <sup>13</sup>C NMR (100 MHz, *d*-DMSO) δ 163.2, 153.0, 130.9, 129.1, 127.4, 126.6, 122.2, 117.0, 116.8, 69.4, 42.2, 34.0, 28.4, 20.9. HRMS calculated for C<sub>19</sub>H<sub>19</sub>N<sub>4</sub> [M+H]<sup>+</sup>, 303.1604; found 303.1599.

#### **9-(1*H*-benzo[*d*]imidazol-2-yl)-9-methyl-7,8,9,11-tetrahydro-6*H*-pyrido[2,1-*b*] quinazoline,**

**12**{2,2}. Yellow oil, (91.6 mg, 0.290 mmol, 58%). <sup>1</sup>H NMR (400 MHz, CDCl<sub>3</sub>) δ 13.03 (s, 1H), 7.78 (s, 1H), 7.45 (s, 1H), 7.31 – 7.20 (m, 2H), 7.14 – 7.11 (m, 1H), 7.09 – 6.95 (m, 2H), 6.81 – 6.65 (m, 1H), 4.72 – 4.48 (m, 2H), 3.10 – 3.04 (m, 3H), 2.15 – 2.03 (m, 3H), 1.99 – 1.80 (m, 3H). <sup>13</sup>C NMR (100 MHz, CDCl<sub>3</sub>) δ 166.2, 155.2, 129.1, 127.1, 125.1, 118.1, 117.0, 68.2, 47.8, 36.4, 31.2, 24.8, 21.3. HRMS calculated for C<sub>20</sub>H<sub>21</sub>N<sub>4</sub> [M+H]<sup>+</sup>, 317.1761; found 317.1760.

#### **10-(1*H*-benzo[*d*]imidazol-2-yl)-10-methyl-6,7,8,9,10,12-hexahydroazepino[2,1-**

***b*]quinazoline, 12**{4,2}. Yellow oil, (71.0 mg, 0.215 mmol, 43%). <sup>1</sup>H NMR (400 MHz, CDCl<sub>3</sub>) δ 8.68 (s, 1H), 7.68 (s, 2H), 7.30 – 7.24 (m, 2H), 7.16 – 7.11 (m, 1H), 7.07 (ddd, *J* = 7.9, 6.6, 1.4 Hz, 1H), 6.99 (td, *J* = 7.5, 1.3 Hz, 1H), 6.77 (dd, *J* = 7.5, 0.8 Hz, 1H), 4.51 (d, *J* = 14.8 Hz, 1H), 4.20 (d, *J* = 14.8 Hz, 1H), 3.20 – 3.14 (m, 1H), 2.93 – 2.88 (m, 1H), 2.79 (q, *J* = 7.2 Hz, 1H),



2.58 – 2.53 (m, 1H), 2.11 – 2.05 (m, 3H), 1.89 – 1.83 (m, 2H), 1.15 (t,  $J = 7.2$  Hz, 2H).  $^{13}\text{C}$  NMR (100 MHz,  $\text{CDCl}_3$ )  $\delta$  160.4, 154.1, 129.0, 126.1, 125.5, 122.7, 117.8, 62.5, 46.0, 45.5, 36.7, 28.8, 23.1, 15.6, 10.2. HRMS calculated for  $\text{C}_{21}\text{H}_{23}\text{N}_4$   $[\text{M}+\text{H}]^+$ , 331.1917; found 331.1915.

**13-(1*H*-benzo[*d*]imidazol-2-yl)-6,13-dihydrobenzo[*f*]benzo[4,5]imidazo[2,1-**

***c*][1,4]oxazepine, **12**{3,1}. Yellow oil, (93.3 mg, 0.265 mmol, 53%).  $^1\text{H}$  NMR (400 MHz,  $\text{CDCl}_3$ )  $\delta$  7.94 (d,  $J = 8.3$  Hz, 1H), 7.82 – 7.64 (m, 2H), 7.57 (dd,  $J = 6.1, 3.0$  Hz, 2H), 7.36 (ddd,  $J = 7.7, 6.8, 2.7$  Hz, 2H), 7.31 – 7.04 (m, 6H), 5.22 (d,  $J = 16.2$  Hz, 1H), 4.95 (d,  $J = 16.3$  Hz, 1H).  $^{13}\text{C}$  NMR (100 MHz,  $\text{CDCl}_3$ )  $\delta$  158.1, 151.3, 150.8, 140.4, 134.1, 132.3, 130.9, 128.0, 126.7, 124.7, 124.3, 122.1, 118.4, 114.9, 110.5, 70.1, 56.7. HRMS calculated for  $\text{C}_{22}\text{H}_{17}\text{N}_4\text{O}$   $[\text{M}+\text{H}]^+$ , 353.1397; found 353.1399.**

**14-(1*H*-benzo[*d*]imidazol-2-yl)-12,14-dihydro-6*H*-benzo[6,7][1,4]oxazepino[3,4-**

***b*]quinazoline, **12**{3,2}. Yellow oil, (123.5 mg, 0.325 mmol, 65%).  $^1\text{H}$  NMR (400 MHz,  $\text{CDCl}_3$ )  $\delta$  13.22 (s, 1H), 7.58 – 7.43 (m, 3H), 7.21 – 7.09 (m, 4H), 7.08 – 6.99 (m, 2H), 6.96 (t,  $J = 7.5$  Hz, 1H), 6.81 (dd,  $J = 14.1, 4.9$  Hz, 2H), 6.23 – 6.09 (m, 2H), 5.13 (d,  $J = 15.0$  Hz, 1H), 5.04 (d,  $J = 15.2$  Hz, 1H), 4.90 (d,  $J = 15.0$  Hz, 1H).  $^{13}\text{C}$  NMR (100 MHz,  $\text{CDCl}_3$ )  $\delta$  159.6, 156.0, 149.8, 131.1, 131.0, 129.7, 129.5, 128.2, 125.9, 124.1, 123.2, 121.4, 120.4, 118.4, 118.0, 117.4, 115.5, 112.5, 67.1, 64.9, 64.8, 52.2. HRMS calculated for  $\text{C}_{23}\text{H}_{19}\text{N}_4\text{O}$   $[\text{M}+\text{H}]^+$ , 367.1553; found 367.1555.**
